# Supplementary material for: Facet-engineering of NH2-UiO-66 with enhanced photocatalytic hydrogen production performance
Source: Royal Society of Chemistry journal article supplement (doi:10.1039/d1dt03424c), 2021-01-01
Supplement: d1dt03424c1.pdf [file d1dt03424c1.pdf]

Supporting Information

**Facet-engineering of NH<sub>2</sub>-UiO-66 with Enhanced Photocatalytic Hydrogen Production Performance**

Xiaofan Shi,<sup>a</sup> Xin Lian,<sup>a</sup> Di Yang,<sup>a</sup> Xiaojuan Hu,<sup>c</sup> Jijie Zhang<sup>\*a</sup> and Xian-He Bu<sup>a,b</sup>

*<sup>a</sup>School of Materials Science and Engineering, Tianjin Key Laboratory of Metal and Molecule-Based Material Chemistry, Nankai University, Tianjin 300350, China.*

*<sup>b</sup>State Key Laboratory of Elemento-Organic Chemistry, College of Chemistry, Nankai University, Tianjin 300071, China.*

*<sup>c</sup>Fritz-Haber-Institut der Max-Planck-Gesellschaft, Faradayweg 4-6, Berlin 14195, Germany.*

Corresponding author: zhangjijie@nankai.edu.cn

**Table S1.** Reactants' concentration and reaction time of different NH<sub>2</sub>-UiO-66 samples.

| <b>Morphology</b>       | <b>c(ZrCl<sub>4</sub>)<br/>(mmol/L)</b> | <b>c(NH<sub>2</sub>-BDC)<br/>(mmol/L)</b> | <b>Equivalent of<br/>HF acid</b> | <b>Reaction<br/>time (h)</b> |
|-------------------------|-----------------------------------------|-------------------------------------------|----------------------------------|------------------------------|
| <b>Cube</b>             | 3                                       | 3                                         | 2                                | 24                           |
| <b>Tetra-decahedron</b> | 6                                       | 6                                         | 4                                | 12                           |
| <b>Octahedron</b>       | 36                                      | 36                                        | 4                                | 12                           |

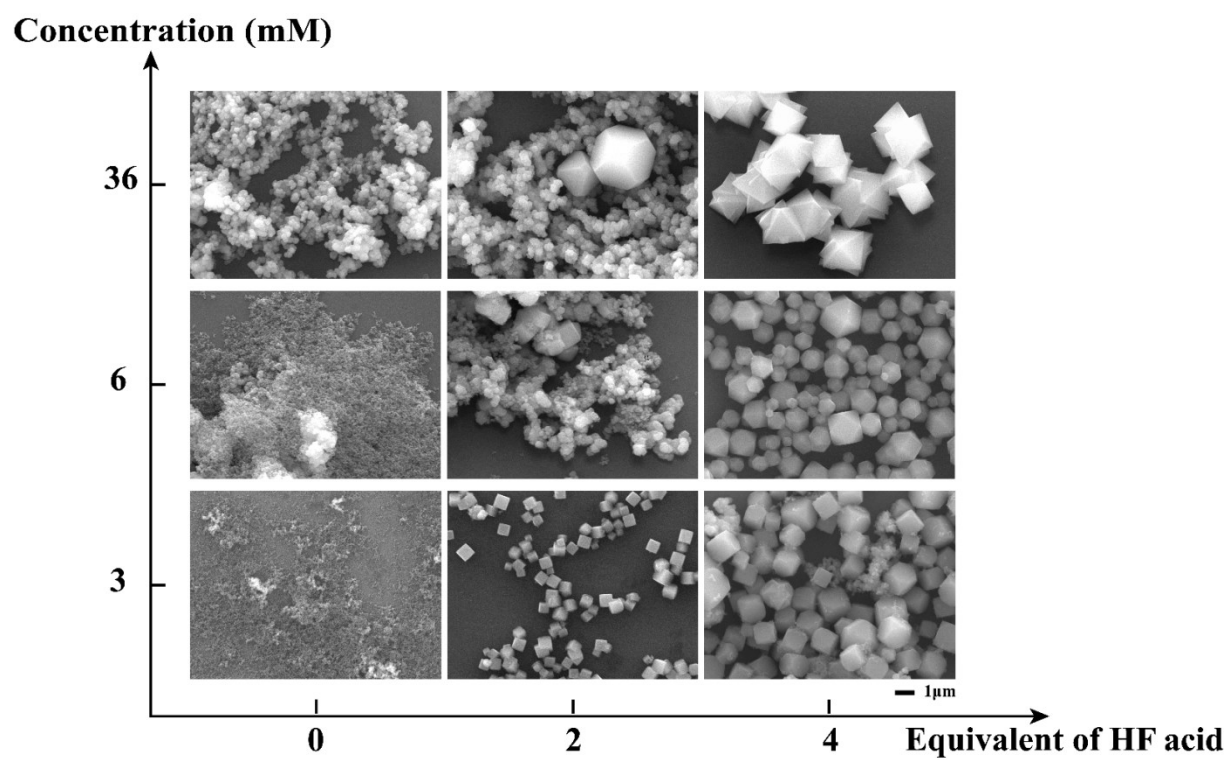

**Figure S1.** Morphology of  $\text{NH}_2\text{-UiO-66}$  in different reactants' concentration and specific equivalent of hydrofluoric acid.

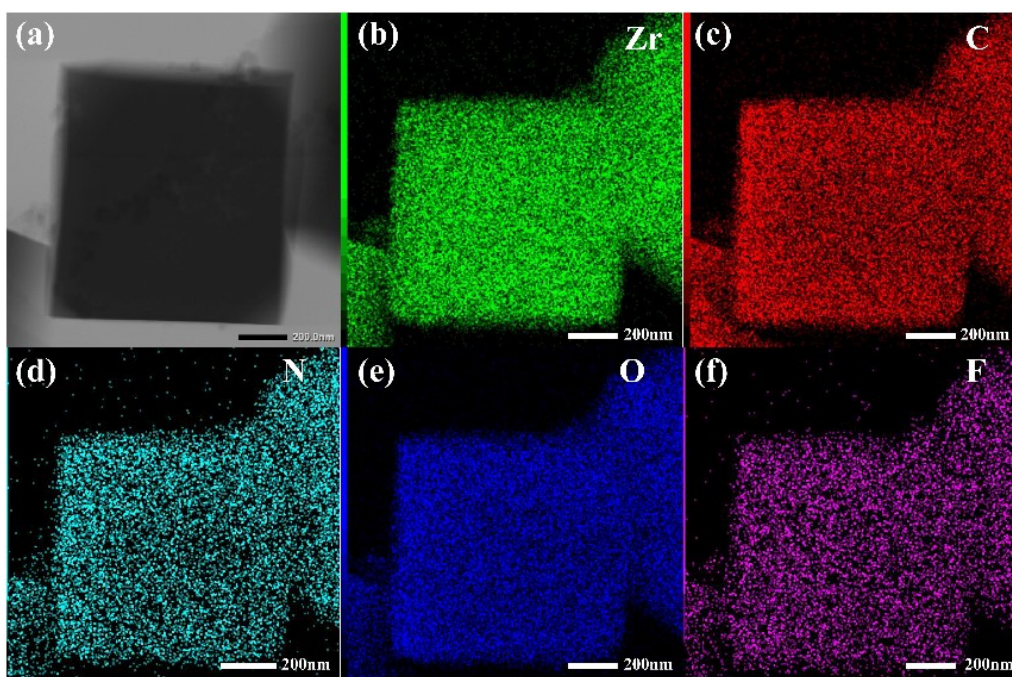

**Figure S2.** (a) TEM and (b-f) mapping images of C-UiO.

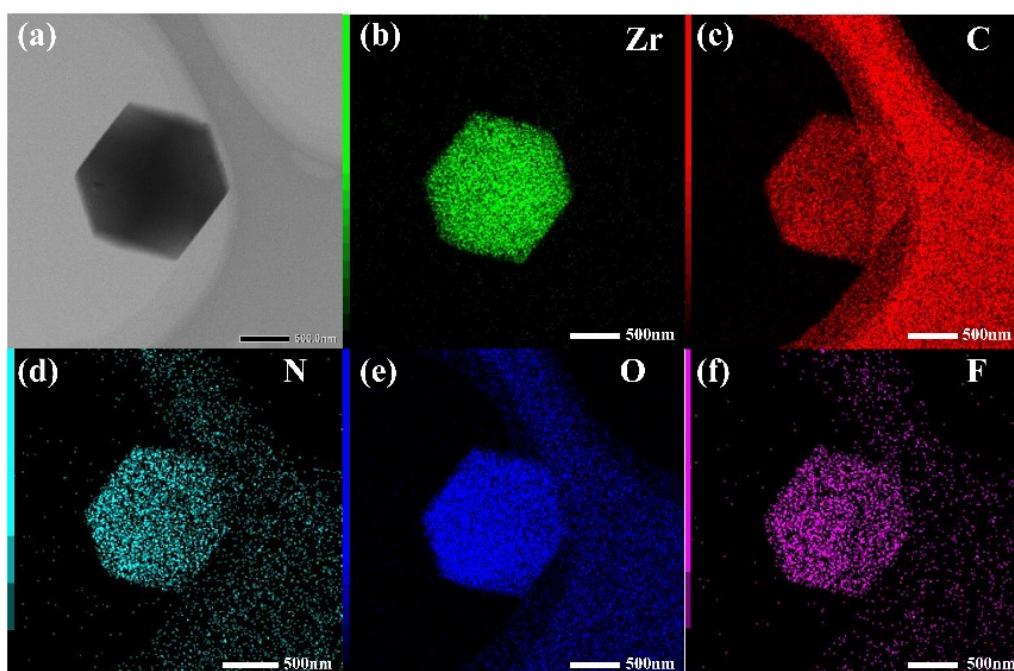

**Figure S3.** (a) TEM and (b-f) mapping images of T-UiO.

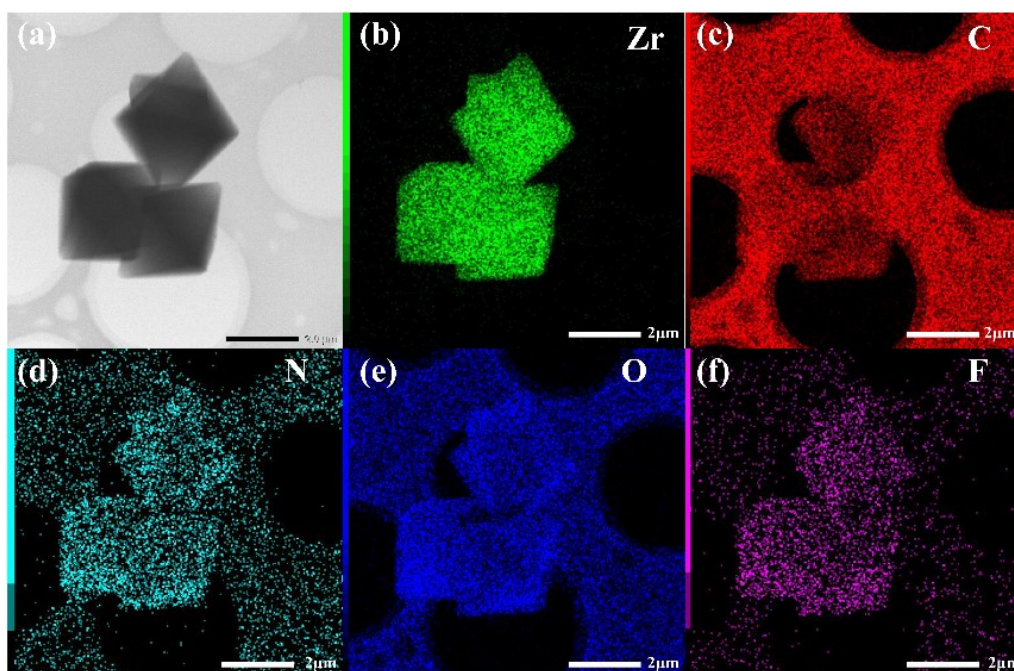

**Figure S4.** (a) TEM and (b-f) mapping images of O-UiO.

**Table S2.** Specific binding energy location of samples.

| Samples                               | Zr3d <sub>3/2</sub> | Zr3d <sub>5/2</sub> |
|---------------------------------------|---------------------|---------------------|
| <b>C-UiO</b>                          | 185.58 eV           | 183.21 eV           |
| <b>T-UiO</b>                          | 185.53 eV           | 183.16 eV           |
| <b>O-UiO</b>                          | 185.62 eV           | 183.25 eV           |
| <b>NH<sub>2</sub>-UiO-66 with HAc</b> | 185.38 eV           | 183.02 eV           |

**Table S3.** Atomic concentration (%) of C1s, N1s, O1s, F1s, and Zr3d in C-UiO, T-UiO, and O-UiO determined by XPS.

|              | C     | N    | O     | F    | Zr   |
|--------------|-------|------|-------|------|------|
| <b>C-UiO</b> | 54.60 | 5.04 | 28.18 | 5.11 | 7.07 |
| <b>T-UiO</b> | 58.39 | 4.80 | 25.43 | 4.84 | 6.54 |
| <b>O-UiO</b> | 54.52 | 5.48 | 27.81 | 5.28 | 6.91 |

**Table S4.** Parameters of equivalent circuit for the impedance data of C-UiO, T-UiO and O-UiO.

| Samples      | $R_s(\Omega)$ | $R_t(k\Omega)$     |
|--------------|---------------|--------------------|
| <b>C-UiO</b> | 30.23         | $3.50 \times 10^3$ |
| <b>T-UiO</b> | 29.26         | $1.24 \times 10^3$ |
| <b>O-UiO</b> | 31.86         | $2.67 \times 10^3$ |

**Table S5.** Fitting results of the time-resolved PL spectra of C-UiO, T-UiO and O-UiO.

| Samples      | $A_1(\%)$ | $\tau_1(ns)$ | $A_2(\%)$ | $\tau_2(ns)$ | $\tau_{ave}(ns)$ |
|--------------|-----------|--------------|-----------|--------------|------------------|
| <b>C-UiO</b> | 0.79      | 0.71         | 0.21      | 4.71         | 3.15             |
| <b>T-UiO</b> | 0.79      | 0.59         | 0.21      | 6.71         | 5.20             |
| <b>O-UiO</b> | 0.87      | 0.56         | 0.13      | 6.05         | 3.99             |

**Table S6.** Fitting results of the TA kinetics of C-UiO, T-UiO and O-UiO.

| Samples      | $A_1(\%)$ | $\tau_1(ps)$ | $A_2(\%)$ | $\tau_2(ps)$   | $\tau_{ave}(ps)$ |
|--------------|-----------|--------------|-----------|----------------|------------------|
| <b>C-UiO</b> | 42.4      | $78 \pm 8$   | 57.6      | $1406 \pm 137$ | $1341 \pm 255$   |
| <b>T-UiO</b> | 48.0      | $23 \pm 4$   | 52.0      | $610 \pm 26$   | $590 \pm 29$     |
| <b>O-UiO</b> | 49.2      | $19 \pm 4$   | 50.8      | $875 \pm 76$   | $858 \pm 80$     |

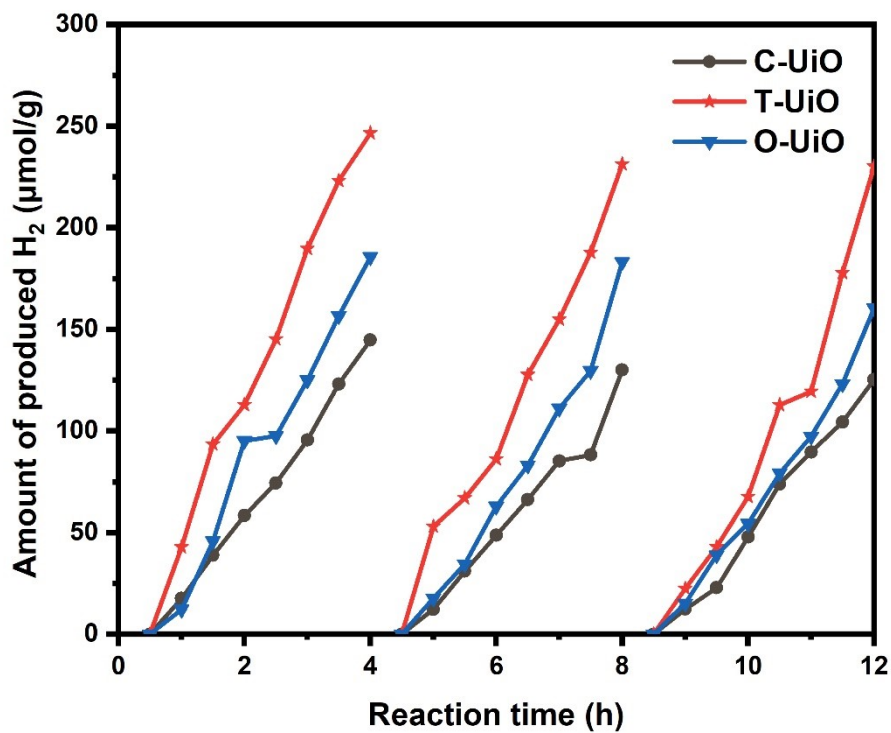

**Figure S5.** Photocatalytic recycling tests of different  $\text{NH}_2\text{-UiO-66}$  samples.

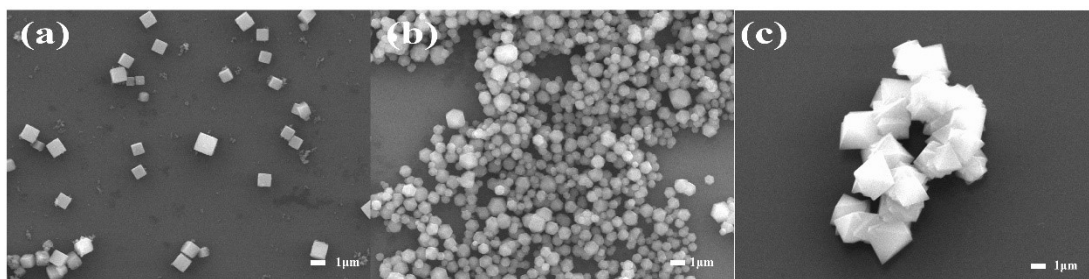

**Figure S6.** SEM images of (a) C-UiO, (b) T-UiO, (c) O-UiO samples after photocatalytic hydrogen reactions.

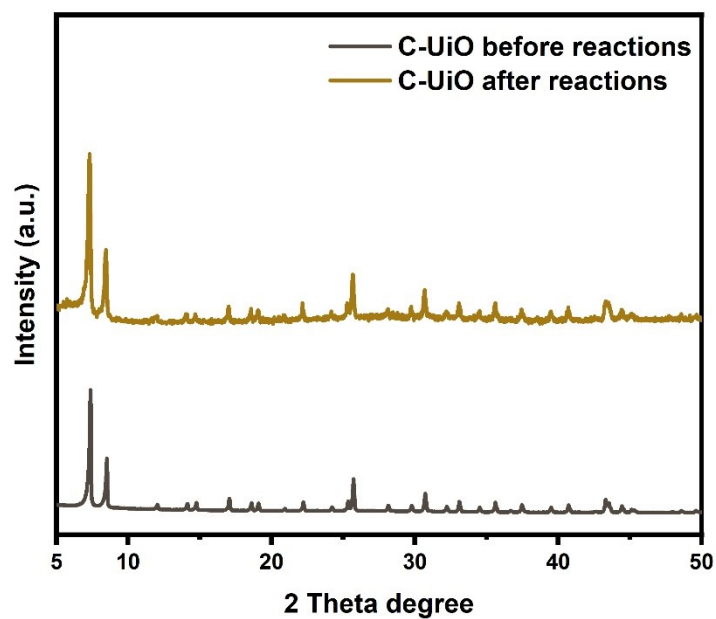

**Figure S7.** XRD patterns of C-UiO samples before and after photocatalytic hydrogen reactions.

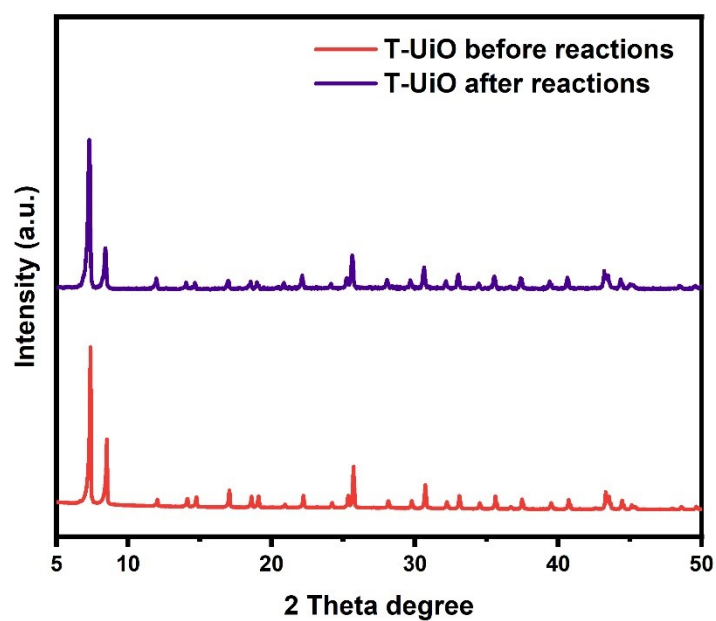

**Figure S8.** XRD patterns of T-UiO samples before and after photocatalytic hydrogen reactions.

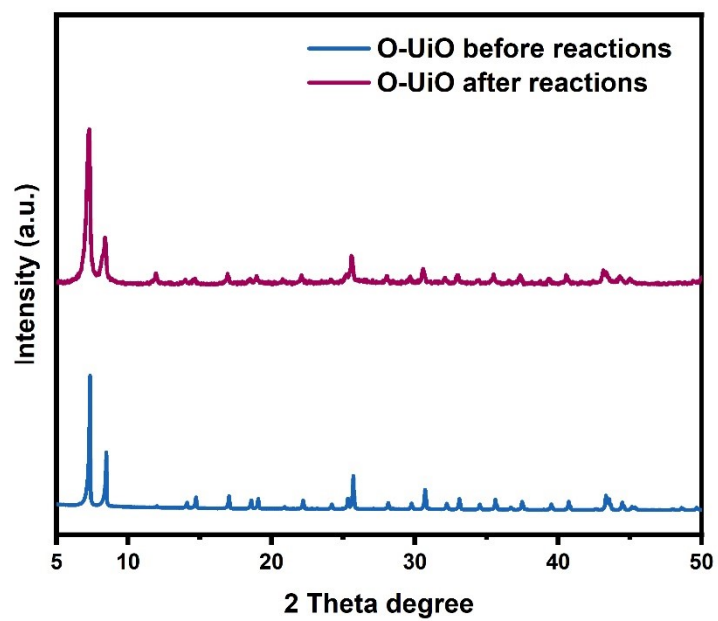

**Figure S9.** XRD patterns of O-UiO samples before and after photocatalytic hydrogen reactions.

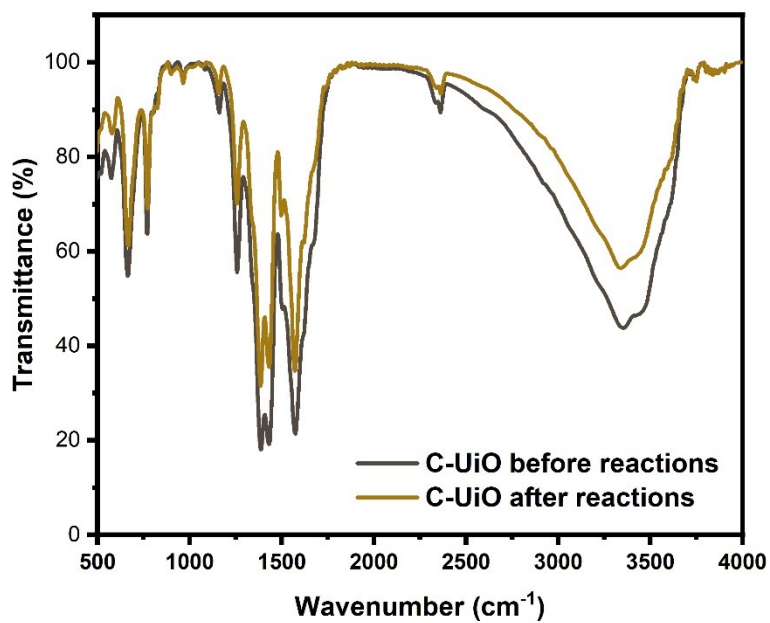

**Figure S10.** FT-IR spectra of C-UiO samples before and after photocatalytic hydrogen reactions.

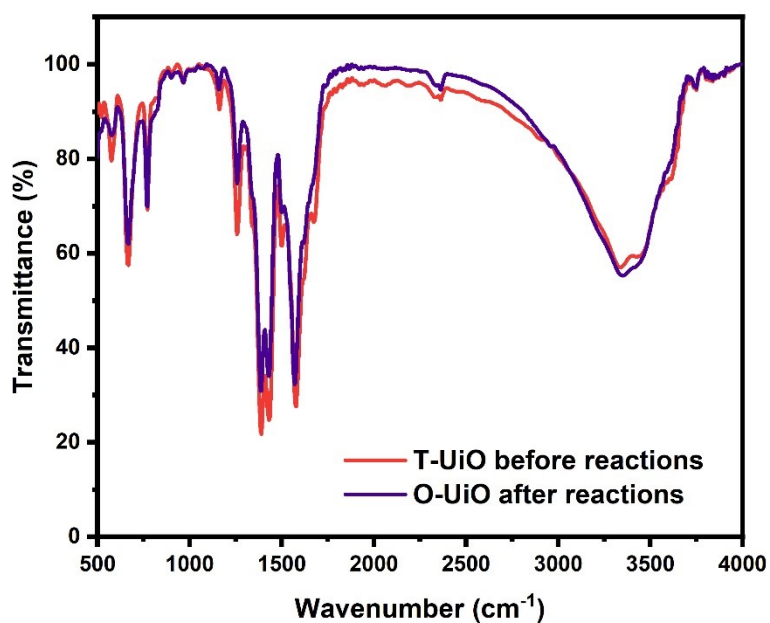

**Figure S11.** FT-IR spectra of T-UiO samples before and after photocatalytic hydrogen reactions.

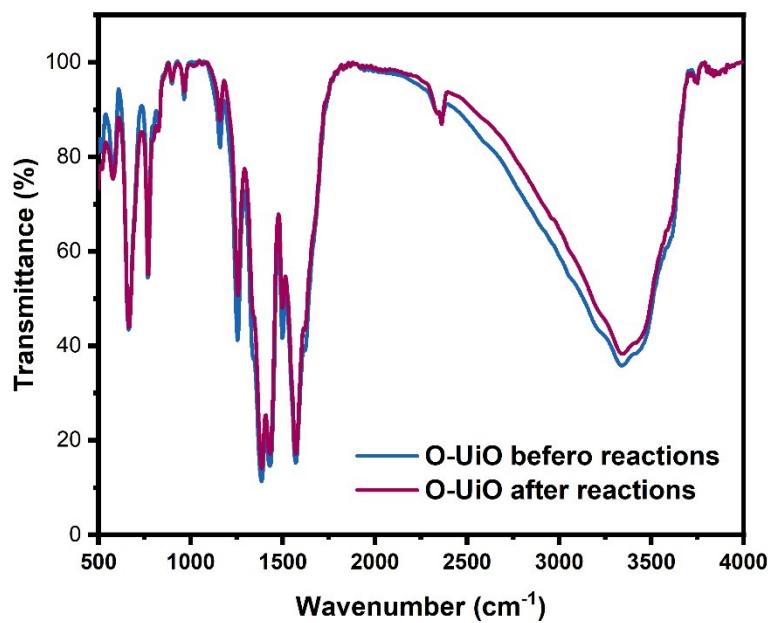

**Figure S12.** FT-IR spectra of O-UiO samples before and after photocatalytic hydrogen reactions.

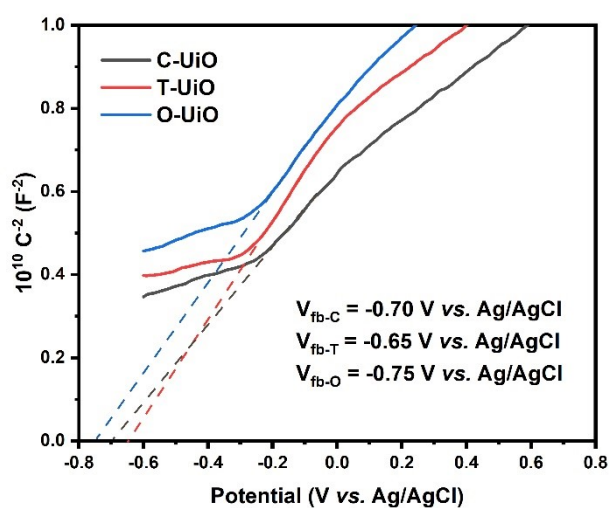

**Figure S13.** Mott-Schottky plots of different NH<sub>2</sub>-UiO-66 samples.

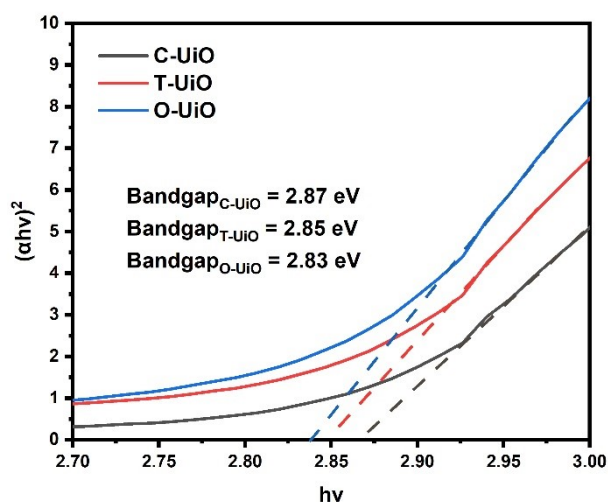

**Figure S14.** Tauc-plots of different NH<sub>2</sub>-UiO-66 samples.

**Table S7.** Band structure data of C-UiO, T-UiO, and O-UiO.

| Samples | HOMO (eV) | LUMO (eV) | Band gap (eV) |
|---------|-----------|-----------|---------------|
| C-UiO   | 2.77      | -0.10     | 2.87          |
| T-UiO   | 2.80      | -0.05     | 2.85          |
| O-UiO   | 2.68      | -0.15     | 2.83          |

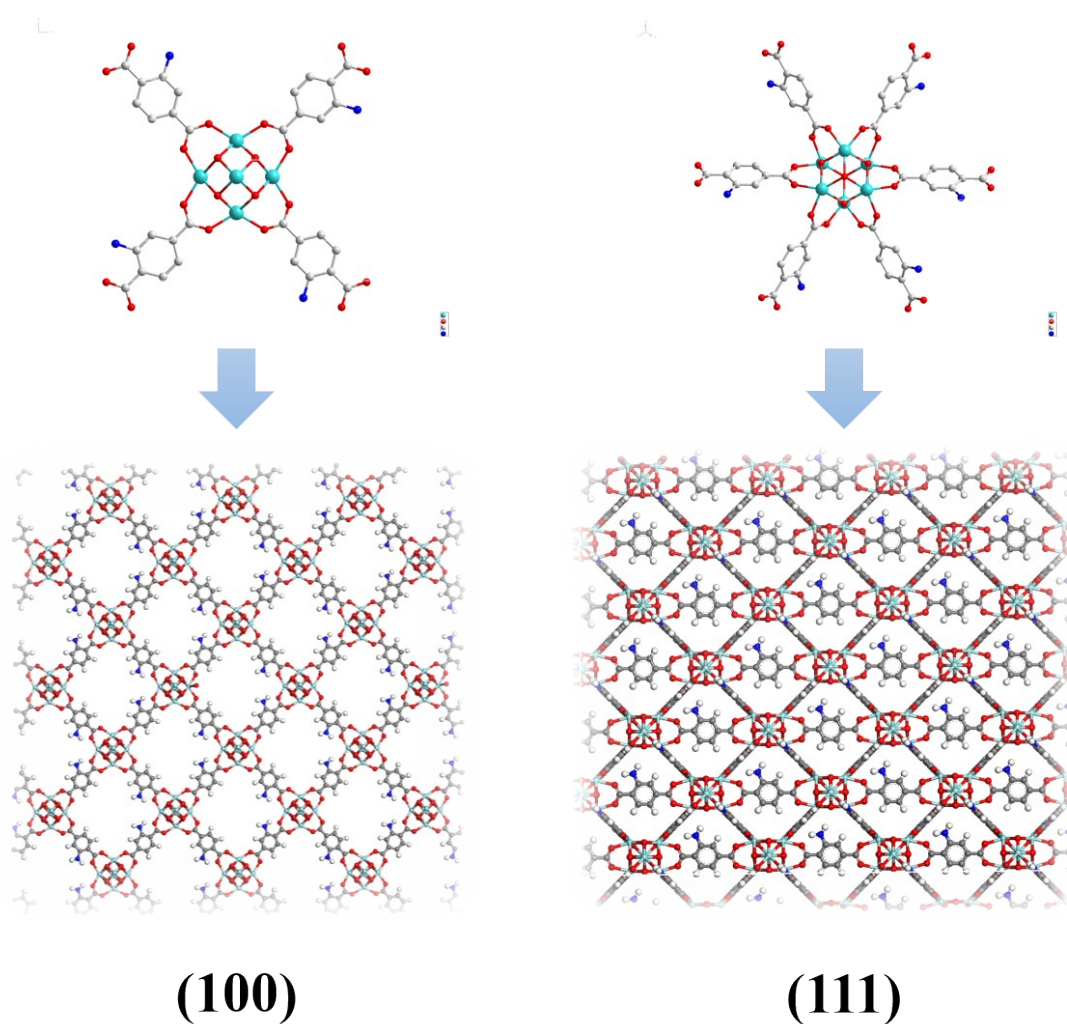

**Figure S15.** Coordination mode and structure of (100) and (111) facets.

To study the surface energy and DOS of these models, first-principles calculations were carried out using density functional theory (DFT) with generalized gradient approximation (GGA) of Perdew-Burke-Ernzerhof (PBE) implemented in the Vienna Ab-Initio Simulation Package (VASP).<sup>1, 2</sup> The valence electronic states were expanded based on plane waves with the core-valence interaction represented using the projector augmented plane wave (PAW) approach and a cutoff of 450 eV.<sup>3</sup> All atoms in the models were relaxed until the residual force was less than 0.05 eV/Å.

The original bulk structure of NH<sub>2</sub>-UiO-66 was obtained from the Cambridge Crystallographic Data Centre (CCDC). The surface model of (100) and (111) facets

were cleaved from the optimized bulk NH<sub>2</sub>-UiO-66 model with a vacuum thickness of 25 Å to suppress the interaction between adjacent slabs. The Brillouin zone integration was sampled with 1x1x1 K-point meshes for geometry optimization. The surface energy of each facet ( $\gamma_{hkl}$ ) was calculated by the following formula:<sup>4</sup>

$$\gamma_{hkl} = \frac{E_{slab} - E_{bulk} - nE_{mol}}{A}$$

The  $E_{slab}$  is the total energy of the relaxed surface model. The  $E_{bulk}$  is the total energy of atoms that corresponding to the slab model in the original bulk system. The  $E_{mol}$  is the energy of small molecules we insert to maintain the chemometric ratio.  $A$  is the surface area of cleaved slab.

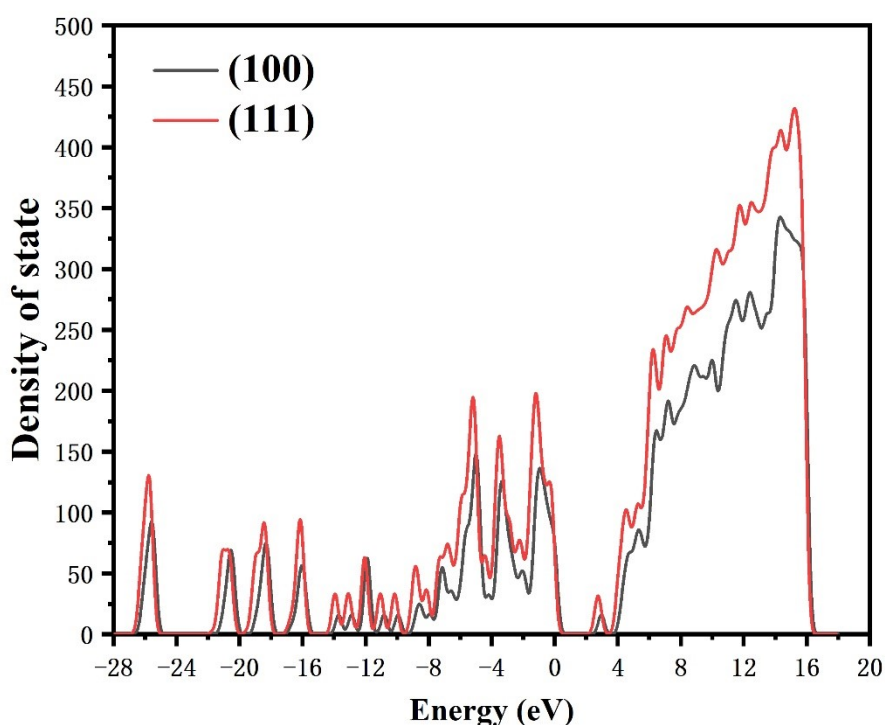

**Figure S16.** Density of states of (100) and (111) facets.

## REFERENCE

1. J. P. Perdew, K. Burke and M. Ernzerhof, *Phys. Rev. Lett.*, 1996, **77**, 3865-3868.
2. Kresse and Furthmuller, *Phys. Rev. B: Condens. Matter*, 1996, **54**, 11169-11186.
3. Blochl, *Phys. Rev. B: Condens. Matter*, 1994, **50**, 17953-17979.
4. F. Guo, J.-H. Guo, P. Wang, Y.-S. Kang, Y. Liu, J. Zhao and W.-Y. Sun, *Chem. Sci.*, 2019, **10**, 4834-4838.
